# Supplementary material
Source: Springer Nature journal article supplement (https://www.springermedizin.de/resource/supplementary/11689_2013_70_MOESM5_ESM.pdf/9673162)

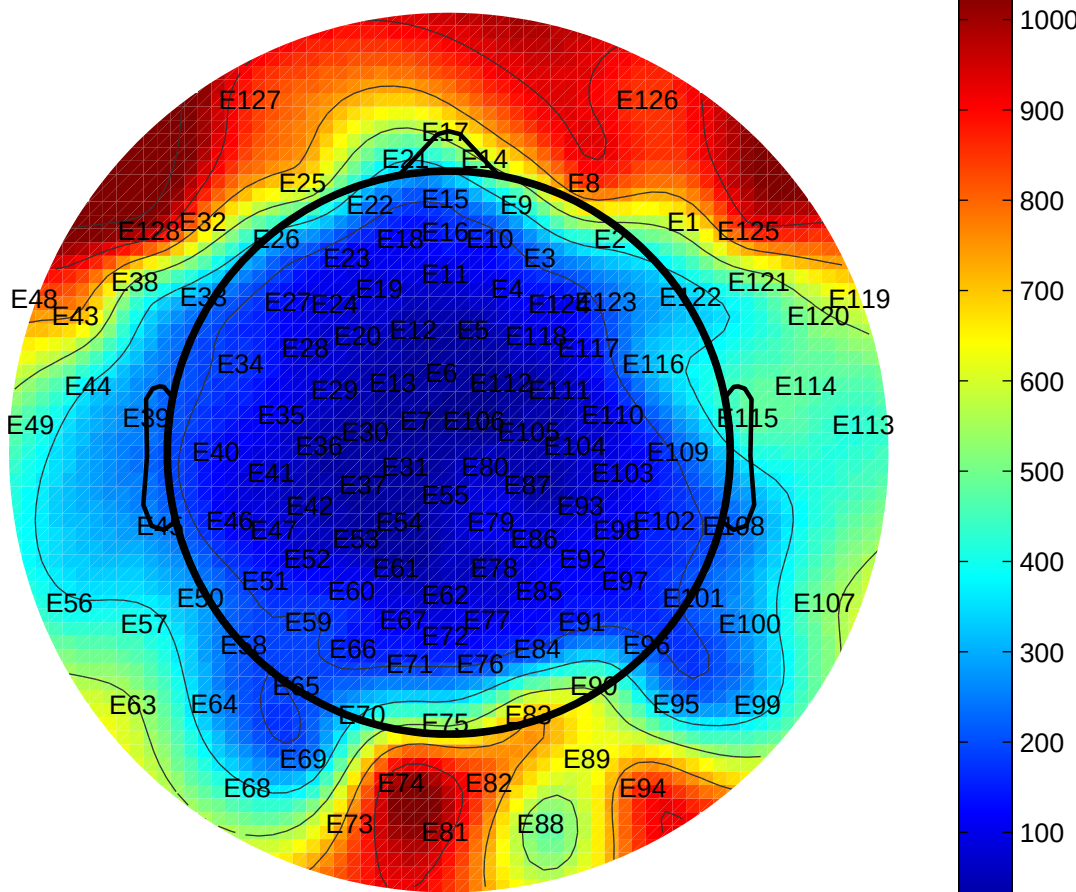

Supplement: MOESM5 [file 9673162]
